1 **Modeling the Sequence Dependence of Differential Antibody Binding in the Immune**  
2 **Response to Infectious Disease**

3 Robayet Chowdhury<sup>1,2</sup>, Alexander T. Taguchi<sup>3</sup>, Laimonas Kelbauskas<sup>1</sup>, Philip Stafford<sup>1</sup>, Chris  
4 Diehnelt<sup>1</sup>, Zhan-Gong Zhao<sup>1</sup>, Phillip C. Williamson<sup>4</sup>, Valerie Green<sup>4</sup>, Neal W. Woodbury<sup>1,2</sup>

5 <sup>1</sup>Center for Innovations in Medicine, Biodesign Institute, Arizona State University, Tempe, AZ  
6 85287

7 <sup>2</sup>School of Molecular Sciences, Arizona State University, Tempe, AZ 85287

8 <sup>3</sup>RubrYc Therapeutics, 733 Industrial Road, San Carlos, CA 94403

9 <sup>4</sup>Creative Testing Solutions, 2424 W. Erie Dr., Tempe, AZ 85382

10

11

12

13 **Abstract**

14 Past studies have shown that incubation of human serum samples on high density peptide  
15 arrays followed by measurement of total antibody bound to each peptide sequence allows  
16 detection and discrimination of humoral immune responses to a wide variety of infectious  
17 disease agents. This is true even though these arrays consist of peptides with near-random  
18 amino acid sequences that were not designed to mimic biological antigens. Previously, this  
19 immune profiling approach or “immunosignature” has been implemented using a purely  
20 statistical evaluation of pattern binding, with no regard for information contained in the amino  
21 acid sequences themselves. Here, a neural network is trained on immunoglobulin G binding  
22 to 122,926 amino acid sequences selected quasi-randomly to represent a sparse sample of  
23 the entire combinatorial binding space in a peptide array using human serum samples from  
24 uninfected controls and 5 different infectious disease cohorts infected by either dengue virus,  
25 West Nile virus, hepatitis C virus, hepatitis B virus or *Trypanosoma cruzi*. This results in a  
26 sequence-binding relationship for each sample that contains the differential disease  
27 information. Processing array data using the neural network effectively aggregates the  
28 sequence-binding information, removing sequence-independent noise and improving the  
29 accuracy of array-based classification of disease compared to the raw binding data. Because  
30 the neural network model is trained on all samples simultaneously, the information common  
31 to all samples resides in the hidden layers of the model and the differential information  
32 between samples resides in the output layer of the model, one column of a few hundred values  
33 per sample. These column vectors themselves can be used to represent each sample for  
34 classification or unsupervised clustering applications such as human disease surveillance.

35

36 **Author Summary**

37 Previous work from Stephen Johnston’s lab has shown that it is possible to use high density  
38 arrays of near-random peptide sequences as a general, disease agnostic approach to  
39 diagnosis by analyzing the pattern of antibody binding in serum to the array. The current

40 approach replaces the purely statistical pattern recognition approach with a machine learning-  
41 based approach that substantially enhances the diagnostic power of these peptide array-  
42 based antibody profiles by incorporating the sequence information from each peptide with the  
43 measured antibody binding, in this case with regard to infectious diseases. This makes the  
44 array analysis much more robust to noise and provides a means of condensing the disease  
45 differentiating information from the array into a compact form that can be readily used for  
46 disease classification or population health monitoring.

47

48 **Keywords**

49 Peptide Array, Neural Network, Immune Profile, Infectious Disease, Classification, Antibody  
50 Binding

51

## 52 Introduction

53 Over the past decade, the Johnston lab and others have developed the use of high  
54 density quasi-random peptide arrays as a tool for generating antibody binding profiles(4-19).  
55 A key feature of these arrays is that the peptide sequences are chosen to cover sequence  
56 space as evenly as possible, rather than focusing on biological sequences or known epitopes.  
57 Due to the random nature of the peptide sequences, this “immunofingerprint” approach  
58 captures mostly low to moderate affinity interactions of antibodies with the array peptides and  
59 has been shown to enable robust detection or identification of immune responses associated  
60 with numerous infectious and chronic diseases(8-10, 12-14, 17). This method involves  
61 applying a small amount of diluted serum to a dense array of peptides with nearly random  
62 sequences of amino acids, typically with >100,000 distinct peptide sequences of about 10  
63 amino acids in length(7). In most of the studies done, only 16 of the 20 natural amino acids  
64 were used to synthesize the peptides. The level of antibody binding to the peptides on the  
65 array is then detected quantitatively using a fluorescently labeled secondary antibody and  
66 imaged by an array scanner. Based on a statistical comparison of binding patterns between  
67 case and reference samples, classifier models can be built to distinguish one disease  
68 response from another(5).

69 The cognate epitopes of the antibodies involved in an immune response are highly  
70 unlikely to appear within a random set of  $\sim 10^5$  sequences on a peptide array. For a linear  
71 epitope of  $\sim 10$  amino acids in length, there are  $\sim 10^{13}$  possible amino acid combinations, yet  
72 somehow the interaction of serum antibodies with only  $\sim 10^5$  sequences captures sufficient  
73 information to both detect and identify disease state with high accuracy(6-10, 12-14, 17, 20).  
74 If sufficient information can be obtained from a random sparse sampling of antibody binding  
75 to 1 out of every  $10^8$  possible sequences ( $\sim 10^{13}/\sim 10^5$ ), then the antibodies associated with an  
76 immune response must recognize millions to billions of different sequences to some extent in  
77 a manner that is disease specific. The fundamental question of the current study is whether  
78 this amino acid sequence-dependent antibody binding can be modeled. If so, such a

79 relationship could potentially be used to more effectively aggregate information from the array  
80 or to design new panels of sequences that more effectively differentiate diseases.

81         Recently, our group modeled the sequence-binding relationships of nine different, well-  
82 characterized, isolated proteins to the peptide arrays described above(21). Binding patterns  
83 of each protein were recorded, and a simple feed-forward, back propagation neural network  
84 model was used to relate the amino acid sequences on the array to the binding values.  
85 Remarkably, it was possible to train the network with 90% of the sequence/binding value pairs  
86 and predict the binding of the remaining sequences with accuracy equivalent to the noise of  
87 the antibody binding measurements (the Pearson correlation coefficients (R) between the  
88 observed and predicted binding values were equivalent to that between measured binding  
89 values of multiple technical replicates, and in some cases as high as R=0.99). In fact, accurate  
90 binding predictions (R > 0.9) for some protein targets could be achieved by training on as few  
91 as hundreds of randomly chosen sequence/binding value pairs from the array. In addition, the  
92 binding predictions were specific; the model captured not only the bulk binding of individual  
93 proteins but also the differential binding between proteins. Finally, a neural network trained on  
94 weakly binding sequences effectively predicted the binding values of sequences on the array  
95 1-2 orders of magnitude greater. At least in the context of the combinatorial space of possible  
96 sequences in this model array-based system (~10 residue peptides using 16 different amino  
97 acids with the C-terminus bound to the surface of a silica substrate), training on one set of  
98 thousands of randomly selected sequences resulted in statistically accurate prediction of the  
99 binding to any other randomly selected set of sequences.

100         Binding to antibodies, in this case IgG in human sera, represents a much more  
101 complex system than binding to isolated proteins, and one might expect substantially more  
102 complex sequence-binding relationships. Other groups have previously developed such  
103 relationships for immune responses using various starting datasets. A number of groups have  
104 looked at overlapping peptides presented on microarrays or in phage display libraries  
105 generated by tiling antigens or entire proteomes(22-27). Panning of phage or bacterial peptide

106 display libraries coupled with next generation sequencing have provided broader binding  
107 profiles(28, 29). The advantage of tiling and panning approaches is that one is starting with  
108 known or suspected binding sequences, and thus the dataset is naturally rich in strong binding  
109 information. In one particularly effective study in this regard, a method referred to as Protein-  
110 based Immunome Wide Association Study was used to explore sequence binding  
111 relationships in 31 systemic lupus erythematosus samples(30). Here a large bacterial display  
112 library ( $10^{10}$  12-mer sequences) was reduced to  $\sim 10^6$  sequences found to bind to serum  
113 antibodies from the samples and the enrichment of specific 5-mer and 6-mer sequences within  
114 the resulting library was determined. These enriched sequences were then used to identify  
115 autoantibodies in the human proteome, and the authors were successful at identifying several  
116 known autoantigens for the disease within their top candidates. The same group has used  
117 similar methods to perform epitope mapping of antibodies to SARS-CoV-2(31).

118 Machine learning algorithms have also been used to develop sequence-based models  
119 predicting binding of proteins to peptides, antibodies, and DNA(32-42). For example, machine  
120 learning models have been used to model anti-microbial peptides, infectious viral variants that  
121 escape protection, potential epitopes on target antigens, high antibody binding regions on  
122 target proteins, and optimization of target DNA sequences for transcription factors. To do this,  
123 two approaches have primarily been used: 1) introducing single or multiple point mutations on  
124 a target site with known function to identify desired leads, and 2) use of proteomes of interest  
125 or known antigenic proteins to predict epitopes. For example, epitope prediction tools such as  
126 BepiPred-2.0 are generally developed using known antigens derived from crystal structures  
127 of antibody-antigen complexes(43). With regard to modeling of serum binding to random  
128 sequences, Greiff *et al*, applied multivariate regression to serum antibody binding to a library  
129 of 255 random peptides(44). In that study, serum antibody binding from naïve mice was well  
130 modeled by relating peptide composition to binding intensity, though binding of serum  
131 antibodies from previously infected mice proved more challenging.

132           The current work focuses on the feasibility of developing comprehensive sequence-  
133 binding relationships that describe the infectious disease specific binding of total IgG to our  
134 model library of 122,926 peptides each between 7 and 12 residues in length and composed  
135 of 16 of the 20 natural amino acids. While this library is clearly limited in terms of size (only  
136  $10^5$  of the trillions of possible sequences), composition (16 of 20 natural amino acids) and  
137 context (C-terminus affixed to a silica surface), it is capable of distinguishing immune  
138 responses to different infectious agents, as described previously(6-8, 13). Neural network-  
139 based models were used to build quantitative relationships for sequence-antibody binding  
140 using sera from cohorts of individuals who are either uninfected (controls) or infected with 5  
141 infectious agents including three closely related members of the family *Flaviviridae* (dengue  
142 virus, West Nile virus and hepatitis C virus), a more distantly related member of the family  
143 *Hepadnaviridae* (hepatitis B virus) and an extremely complex eukaryotic trypanosome (agent  
144 of Chagas disease, *Trypanosoma cruzi*). This allowed a thorough evaluation of the model's  
145 ability to capture the disease-specific information content of the array binding. This study  
146 showed that it is possible to create accurate sequence-binding models, which not only  
147 maintain the disease specific information, but also effectively capture the binding information  
148 on the arrays for applications in noise suppression and disease classification.  
149

150 **Results**

151 **Study Design and Initial Analysis:**

**Table 1: Sample information**

| Disease cohort                    | Sample Source <sup>1</sup> | Samples Collected | Low CV Samples <sup>2</sup> | Genome Size(bp) |
|-----------------------------------|----------------------------|-------------------|-----------------------------|-----------------|
| Hepatitis C Virus (HCV)           | CTS                        | 100               | 78                          | 11,000          |
| Dengue Virus, Serotype 4 (Dengue) | CTS and SeraCare           | 65                | 57                          | 9600            |
| West Nile Virus (WNV)             | CTS                        | 100               | 74                          | 11,000          |
| Hepatitis B Virus (HBV)           | CTS                        | 100               | 86                          | 3200            |
| <i>T. cruzi</i>                   | CTS                        | 96                | 70                          | 105M            |
| Uninfected (ND)                   | CTS and ASU                | 218               | 177 <sup>3</sup>            | --              |

<sup>1</sup>CTS is Creative Testing Solutions (Tempe, AZ); ASU is Arizona State University; SeraCare address is Milford, MA

<sup>2</sup>Arrays passing the data quality metrics used in the initial neural network analysis. The remaining high CV samples were used as a test set for certain classification studies.

<sup>3</sup>100 randomly selected uninfected samples were used for the bulk of the neural network analysis to remain reasonably balanced with other cohorts.

152 The serum samples shown in Table 1 were incubated on identical peptide microarrays as  
153 described in Methods and IgG bound to the array peptides was detected via subsequent  
154 incubation with a secondary anti-IgG antibody. The peptide sequence 'QPGGFVDVALSG' is  
155 present on the array as a set of replicate features (n=276). This peptide sequence gives a  
156 consistently moderate to strong binding value from sample to sample and is used to assess  
157 the intra-array spatial uniformity of antibody binding intensities. Median normalized arrays  
158 with an intra-array replicate feature coefficient of variation (CV)  $\geq 0.3$  for this peptide  
159 sequence were set aside as well as arrays that showed significant physical defects or overall  
160 differences in binding intensity between different regions of the array (collectively these are  
161 referred to as “High CV samples”). In all, 20% of the 679 arrays measured were excluded  
162 from the initial part of the analysis but considered in the last section which focuses on using  
163 the sequence-binding relationship to remove noise from the arrays. Thus, 542 arrays total  
164 were considered “Low CV Samples” in Table 1.

165 ***Comparison of average binding profiles of peptides to serum IgG.*** Figure 1 shows the  
166 cohort average serum IgG binding intensity distributions of the 122,926 unique peptide



167 sequences. The samples were all median normalized prior to averaging each peptide  
168 binding value within the cohort. The  $\log_{10}$   
169 of the average binding is displayed on the  
170 x-axis as the log distributions are much  
171 closer to a normal distribution than are the  
172 linear binding values. Sera from  
173 individuals infected with HCV, dengue  
174 virus or WNV have sharper distributions  
175 (smaller full width at half maximum) than  
176 the other samples, while sera from  
177 individuals infected with HBV show a  
178 distribution width similar to those from  
179 uninfected donors. Sera from individuals

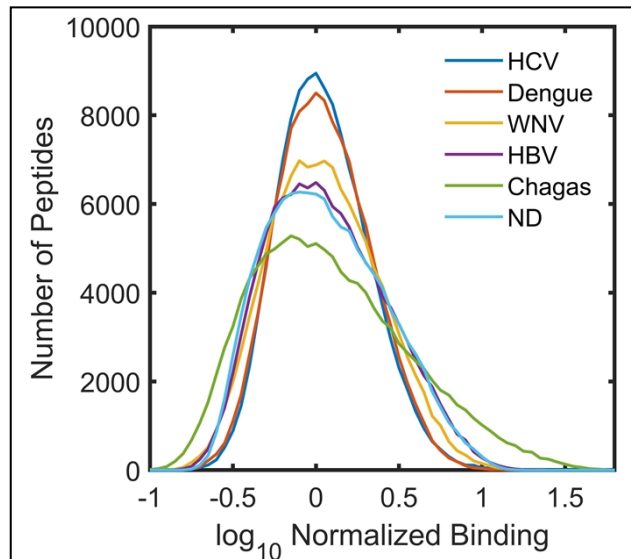

**Fig. 1. Average Binding Distributions of the Cohorts.** Average binding intensity distributions of serum IgG binding to array peptides for the 6 different sample cohorts. For each cohort the  $\log_{10}$  of the average binding for each peptide sequence was used to create the distribution.

180 with Chagas disease have a broader binding distribution than the others, with a long tail on  
181 the high binding side. Overall, the width of the distribution increases with increasing  
182 proteome size. Interestingly, for the viruses with small proteome some of the higher binding  
183 antibodies are lost compared to uninfected samples. However, it is important to remember  
184 that the array peptides have no relationship to the viral proteomes or indeed any biological  
185 proteome, except by chance. Thus, what is lost in the small virus samples compared to  
186 strong binding in uninfected samples, may well be gained in more specific binding not  
187 immediately apparent.

## 188 **Neural Network Analysis**

189 The fundamental question of this study is whether it is possible to accurately predict the  
190 sequence dependence of the antibody binding associated with an immune response to a given  
191 pathogen, both in terms of accurately representing the IgG binding to each peptide sequence  
192 in individual serum samples and in terms of the ability of the neural network to capture  
193 sequence dependent differences in IgG binding between samples and cohorts. Towards this

194 end, the low CV samples (Table 1) were analyzed using feed forward, back propagating neural  
195 network models(21) in two different ways. In one approach, each sample was analyzed  
196 separately such that a neural network was trained on every serum sample independently. In  
197 the second approach, all samples were fit together such as that a single neural network was  
198 trained to simultaneously predict the binding for all samples for any given sequence. In both  
199 cases, the optimized network involved an input layer with an encoder matrix (see Methods),  
200 two hidden layers with 350 nodes each and an output layer whose width corresponded to the  
201 number of target samples (1 for individual fits and 465 when all samples were fit  
202 simultaneously). The loss function used was the sum of least squares error based on a  
203 comparison of the predicted and measured values for the peptides in the sample.

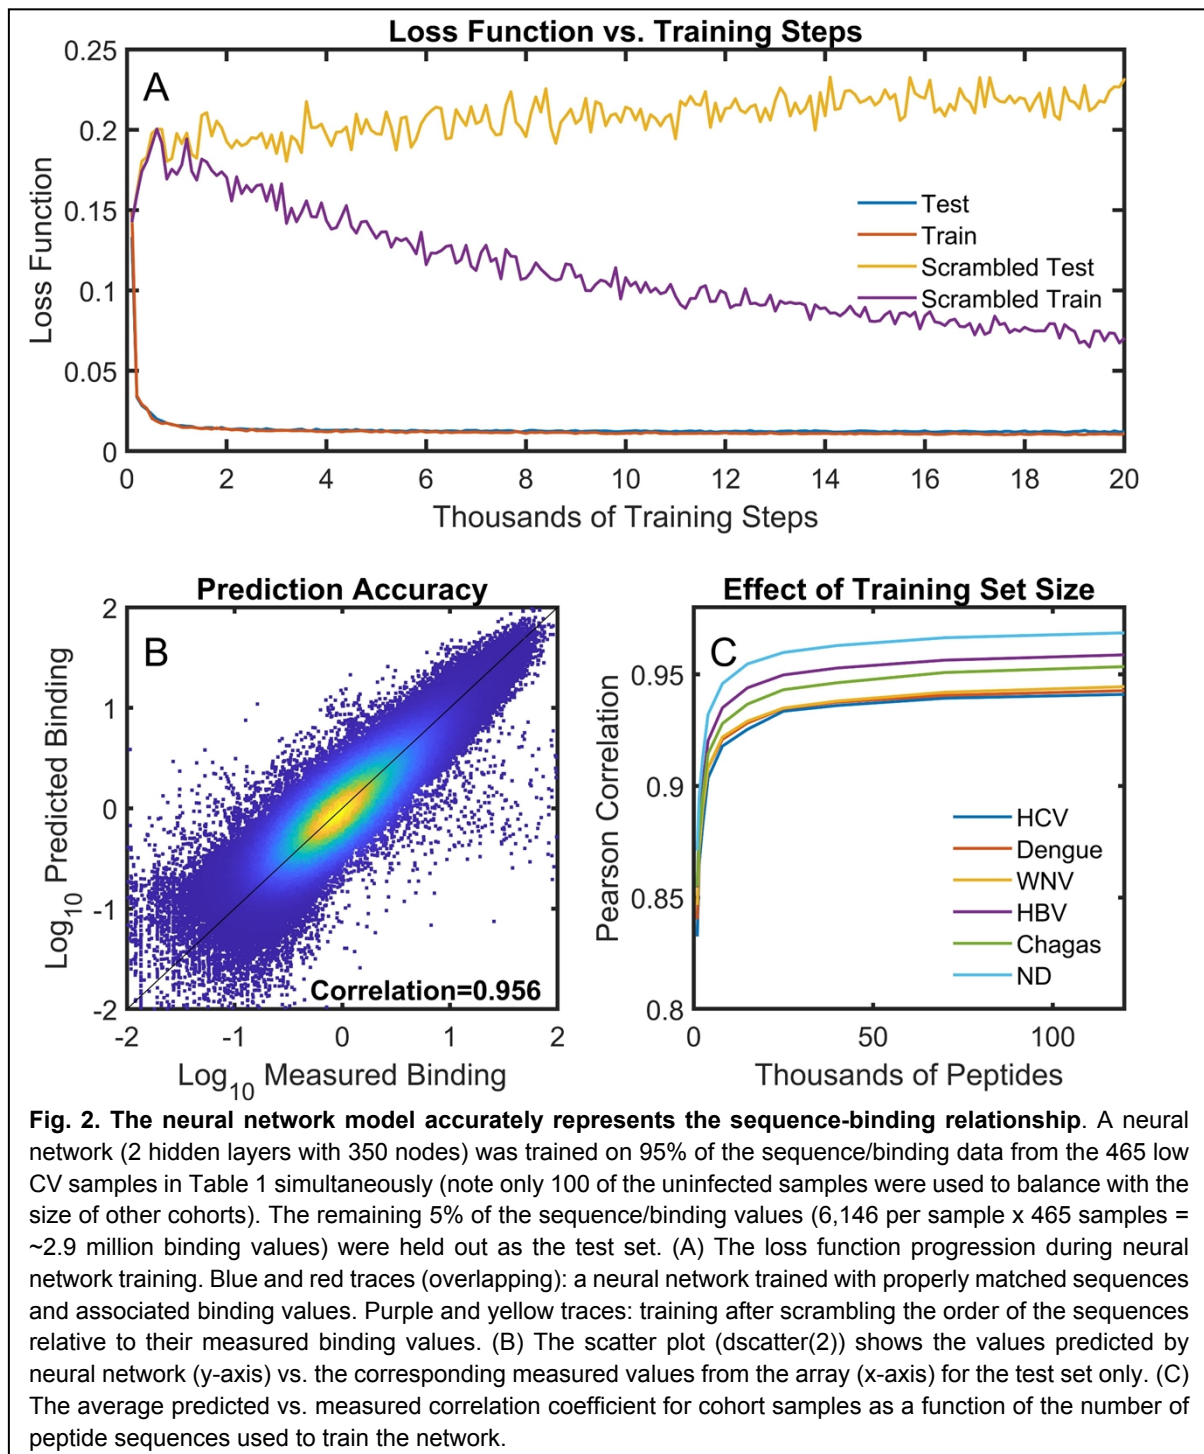

204 **The neural network uses the sequence information to rapidly converge on a solution.**

205 Fig. 2A shows the rate at which the loss function drops during training using the simultaneous

206 fitting approach in which all samples are analyzed together. When the correct sequence is

207 paired with its corresponding binding value (blue and red lines, Fig. 2A), the value of the loss

208 function drops rapidly and the values for the training set and test set drop in concert; there is

209 almost no overfitting. As a control, the same neural network was used to analyze data in which

210 the order of the peptide sequences was randomized relative to their binding intensities. One  
211 would not expect any relationship between sequence and binding under these circumstances.  
212 In this case, the loss function value for both the training and test initially rise slightly followed  
213 by a slow drop for the training set of peptides over the entire training period and a slow rise  
214 for the test set (yellow trace: test, purple trace: train) indicating overfitting of the training set.  
215 This implies that the neural network is capable of rapidly converging on a true relationship  
216 between the sequences and their binding values in the context of the array peptide library.

217 ***The neural network results in a comprehensive binding model applicable across the***  
218 ***model sequence space used.*** Fig. 2B shows a scatter plot comparing the predicted and  
219 measured values from a neural network model fitting all samples simultaneously. In this case,  
220 the model was trained on 95% of the peptide sequence-binding pairs, randomly selected, with  
221 the remaining 5% or 6,146 peptide sequences excluded from training and used for model  
222 testing (that is 6,146 binding values for each of the 465 low CV samples used = ~2.9 million  
223 binding values in the test set). Only the test set values are displayed in Fig. 2B. Since the  
224 sequences used on the array are nearly random, these sequences should be statistically  
225 equivalent to any randomly selected set of sequences from the combinatorial space of  
226 possible sequences sampled by the array (peptides of about 10 residues utilizing any of 16  
227 amino acids corresponds to about  $10^{12}$  sequences). The Pearson correlation coefficient (R)  
228 between the measured and predicted values for the test sequences shown is 0.956. Repeating  
229 the training 100 times with randomly selected train and test sets gives an average correlation  
230 of 0.956 with a standard error of the mean of 0.002. The correlation coefficient between  
231 measured and predicted binding for the 95% of the sequences used to train the neural network  
232 was 0.963 +/- 0.002. This implies that there is almost no overfitting associated with the model  
233 (the quality of fit between the test and train data is similar), a conclusion also apparent in the  
234 loss function data of Fig. 2A. Fig. S1 shows the correlation coefficient between measured and  
235 predicted binding for each individual sample in the test dataset (using a simultaneous fit of all

236 samples). While some cohorts and some samples were better represented than others, for  
237 the vast majority of the samples, the correlation coefficients are greater than 0.9.

238 ***10<sup>3</sup> to 10<sup>4</sup> peptides are sufficient to***  
239 ***provide a reasonable description of the***  
240 ***entire combinatorial peptide sequence***  
241 ***space.*** Neural network models were  
242 trained with different numbers of randomly  
243 selected peptides, and binding was  
244 predicted for the remaining portion of the  
245 peptides. Fig. 2C explores the  
246 dependence of the overall correlation  
247 coefficient between measured and  
248 predicted binding values for the test set of

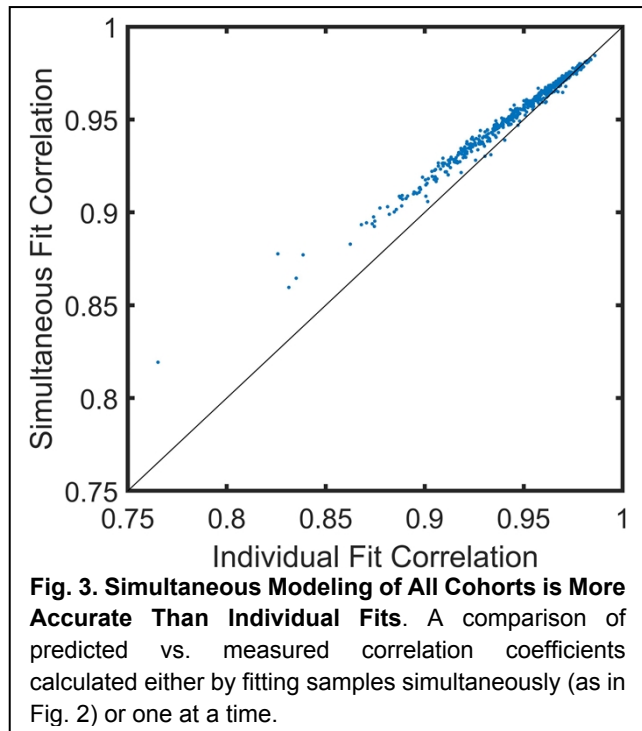

249 each of the sample cohorts as a function of the number of peptides used in the training. When  
250 at least 10,000 peptide sequences are used to train the neural network, the correlation  
251 coefficient is >0.9 for all cohorts, and the correlation is >0.85 when the model is trained using  
252 only 2,000 peptides. This implies that even a very sparse sampling of this sequence space  
253 provides a reasonably accurate model of the sequence-binding relationship. The correlation  
254 coefficients do continue to increase slowly as a function of training set size. Thus, even though  
255 a relatively small set of peptides gives a reasonable overall picture, the predictive power of  
256 the relationship continues to improve with more data, and if even more peptide sequences  
257 were available for training than the entire 122,926 peptides on the array, an improved  
258 prediction would be expected.

259

260 ***There are commonalities in the binding of each sample that make simultaneous***  
261 ***modeling of all samples more accurate than individual neural network models.*** As stated  
262 above, it is possible to either build entirely independent neural network models for each of the

263 samples considered or to build models that fit all of the samples simultaneously. Fig. 3 shows  
264 a direct comparison of the measured vs. predicted correlation coefficients of each sample  
265 using the simultaneous and individual model approaches. In almost every case, the  
266 simultaneous model is more accurate, providing a small improvement in correlation coefficient.  
267 This implies that the network learns commonalities between IgG binding from serum across  
268 all samples and different cohorts and uses those commonalities to improve the model. In the  
269 simultaneous model, these common features are learned by the 2 hidden layers of the neural  
270 network and the differences between samples are learned in the output layer (the final weight  
271 matrix), with separate columns in that layer giving rise to the binding values for each sample.  
272 Simultaneous modeling of all the samples is used for the remainder of the analyses in this  
273 work. Simultaneous modeling was also dramatically faster than fitting each sample dataset  
274 separately. For comparison, a simultaneous training required about 10 minutes to complete  
275 on an 18 CPU core machine while the individual modeling required about 10 hours even after  
276 optimizing parallel processing.

### 277 **The Neural Network Learns Distinguishing Characteristics of Cohorts**

278 Fig. 4A is a schematic of three approaches to disease classification and discrimination. The  
279 blue line is the standard statistical pathway (immunosignaturing). Here, no sequence  
280 information is used in the analysis and the binding values are either fed into a classifier (Fig.  
281 4B) or used to determine the number of significant peptides that distinguish diseases (Fig.  
282 4C), as described below. Alternatively, the neural network can be used to determine a  
283 sequence/binding relationship. This relationship can either be used to recalculate predicted  
284 binding values for the array peptide sequences, forcing the data to always be consistent with  
285 the sequences (red line), or it can be projected onto a completely new set of sequences (an  
286 *in silico* array, orange line), and those projected binding values used in classification or  
287 determining the number of significant distinguishing peptides between disease pairs.

288 ***Values predicted by the neural network result in better ability to distinguish cohorts.***



289 In Fig. 4C-E, the number of peptide binding values that are significantly greater in one cohort  
 290 (on the Y-axis) compared to another (on the X-axis) are shown in each grid. Significance was  
 291 determined by calculating p-values for each peptide in each comparison using a T-test  
 292 between cohorts adjusted for multiple hypothesis comparisons using the Bonferroni correction.

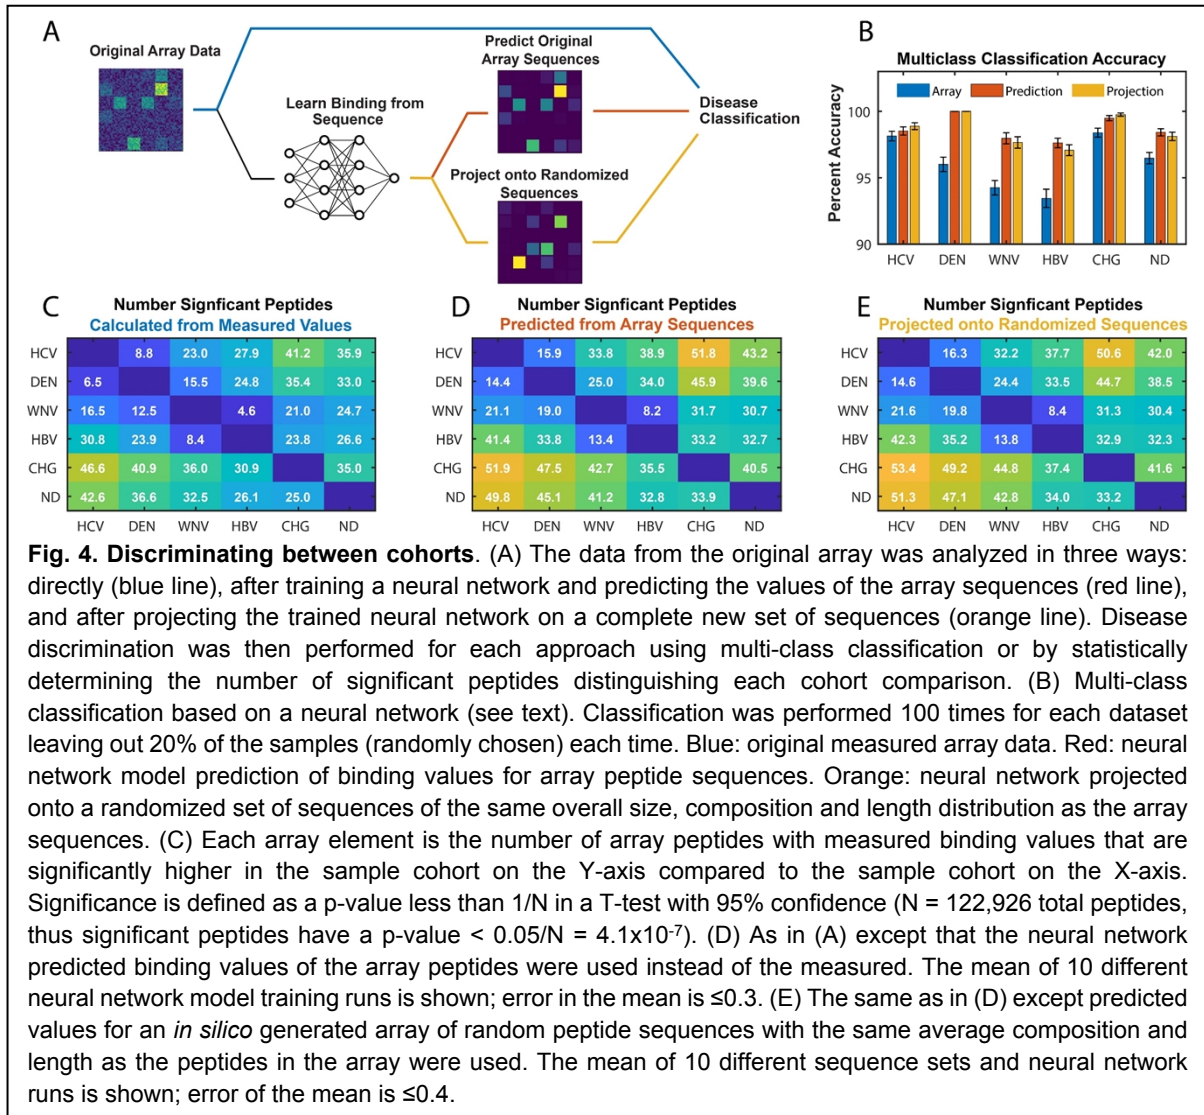

293 Significant peptides are those in which the p-value is less than 1/N (N=122,926) with >95%  
 294 confidence. Fig. 4C shows comparisons between cohorts using the measured data from the  
 295 arrays. As one might expect, the sera from donors infected with the Flaviviridae viruses are  
 296 most similar to one another in terms of numbers of distinguishing peptides. In general, they  
 297 are more strongly distinguished from HBV (except for WNV) and very strongly distinguished  
 298 from Chagas donors. If one follows, for example, the top row of Fig. 4C for HCV, moving to  
 299 the right one sees that the numbers increase as more and more genetically dissimilar

300 comparisons are made. West Nile virus is an exception in this regard. While it is more similar  
301 to Dengue virus than it is to Chagas, it is most similar, in terms of numbers of distinguishing  
302 peptides, to HBV (Fig. 4C).

303 Figure 4D is the same as Fig. 4C except that in this case, the predicted values from the neural  
304 network model are used for the array sequences instead of the measured values. Because  
305 the network requires that a common relationship between sequence and binding be  
306 maintained for all sequences, it increases the signal to noise ratio in the system such that  
307 significantly more distinguishing peptides are identified in every comparison. The neural  
308 network was run 10 times and the results were averaged.

309 Figure 4E shows results in the same format as the other two panels but using *in silico*  
310 generated sequences and their binding values predicted by the neural network model trained  
311 on peptide array binding data. These sequences were produced by taking the amino acids at  
312 each residue position in the original sequences and randomizing which peptide they were  
313 assigned to (considering the sequences as a matrix with rows representing peptides in the  
314 array and columns representing residue positions, order of amino acids in each column was  
315 randomized separately and at the end any spaces due to varying peptide lengths were  
316 removed). This created an *in silico* array with a completely new set of sequences that had the  
317 same number, overall amino acid composition and average length as the sequences on the  
318 physical array to ensure a consistent comparison. The binding values for each sample were  
319 then predicted for this *in silico* array and those values were used in the cohort comparisons.  
320 The number of significant peptides identified using the new sequence set (Fig. 4E) are  
321 identical to within error for each comparison with the predictions from the actual array peptide  
322 sequences used in the training (Fig. 4D). Note that the result of generating ten different  
323 randomized *in silico* arrays was averaged.

324 Another way to understand how well distinguishing information is captured by the neural  
325 network model is to compare classification based on measured values vs. predicted values.  
326 Fig. 4B shows the result of applying a multiclass classifier, either to the measured binding



327 values, the binding values predicted for the array sequences, or binding values predicted for  
328 *in silico* generated sequences. A simple multiclass classifier was built using a neural network  
329 with a single hidden layer with 300 nodes (described in the supplementary information). This  
330 will be referred to simply as the “multiclass classifier” to avoid confusion with the neural  
331 network used to model the sequence-binding relationship. The multiclass classifier cannot  
332 effectively use all peptides for each sample. Peptide feature selection was performed using a  
333 peptide-by-peptide T-test between the binding values of each cohort vs. all others. Either 20  
334 features (the measured data) or 40 features (the two predicted data sets) were used per cohort,  
335 with the number of features chosen to be optimal for the dataset (see Fig. 4 caption). The  
336 training target is a one-hot representation of the sample cohort identity, and the network is set  
337 up as a regression. 80% of the samples were randomly selected and used to train the  
338 multiclass classifier and 20% were used as the test set. Each test sample was then assigned  
339 a cohort label based on the largest value in the resulting predicted output vector. The process  
340 was repeated 100 times and overall prediction accuracy determined. For every cohort, with  
341 the possible exception of HCV, classification was improved relative to direct use of the  
342 measured array values (blue bars) when using the predicted values. This was true using either  
343 predicted values for the array sequences (red bars) or predicted values resulting from  
344 projection of the trained network on the randomized *in silico* array sequences (orange bars).

#### 345 **Understanding the Noise Reduction Properties of Neural Network Modeling**

346 The results presented above show that by using the sequence/binding information to first train  
347 a neural network model and then predicting the binding using that model (on the same or a  
348 different set of sequences), it is possible to improve the signal to noise ratio in the data, at  
349 least for the purpose of differentiating between disease cohorts. To understand this in more  
350 detail, the effects of noise added to the data was explored.

351 ***Gaussian noise is effectively removed by the model.*** In Fig. 5, noise was artificially added  
352 to each point in the measured dataset by using a random number generator based on a  
353 gaussian distribution that was centered at the measured value:

354 
$$f(x) = \frac{1}{\sigma\sqrt{2\pi}} e^{-\frac{1}{2}\left(\frac{x-\mu}{\sigma}\right)^2}$$

355 In the above equation, mu ( $\mu$ ) is the  $\log_{10}$  of the median normalized measured binding value.

356 Sigma ( $\sigma$ ) was then varied from 0 to 1 to give different levels of added noise. Note that sigma

357 =1 results in addition of noise on the order of 10-fold greater or less than the linear binding

358 value measured (due to the  $\log_{10}$  scaling). Fig. 5A shows the resulting distribution of peptide

359 binding values after adding noise. The peptide binding values were mean normalized across

360 all cohorts and then plotted as a distribution, for each cohort (since this is the  $\log_{10}$  of the mean

361 normalized value, the distributions are centered at 0). As sigma is increased, the width of the

362 resulting distribution after adding noise increases dramatically.

363 Fig. 5B plots the multi-class classification  
364 accuracy of each dataset for each sample cohort  
365 as a function of sigma (this uses the same  
366 multiclass classifier as Fig. 4). The classification  
367 accuracy of the original measured data with  
368 increasing amounts of noise added drops rapidly  
369 (dashed lines). Since this is a 6-cohort multi-  
370 class classifier, random data would give an  
371 average accuracy of ~17%. The measured  
372 values with added noise approach that accuracy  
373 level at the highest noise. However, by running  
374 the data through the neural network and then  
375 using predicted values for the same sequences  
376 as are on the array, the accuracy changes only  
377 slightly for sigma values up to about 0.5 and then  
378 drops gradually with increased noise, but always  
379 remains well above what would be expected for  
380 random noise. Note that a sigma of 0.5  
381 corresponds to causing the linear measured  
382 values to randomly vary between about 30% and  
383 300% of their original values.

384 **Neural network predictions of array signals**  
385 **improved classification of high CV samples.**

386 As described above, 137 samples were not  
387 used in the analyses above because they either had high CV values calculated from  
388 repeated reference sequences across the array or because there were visual artifacts such  
389 as scratches or strong overall intensity gradients across the array. A neural network model

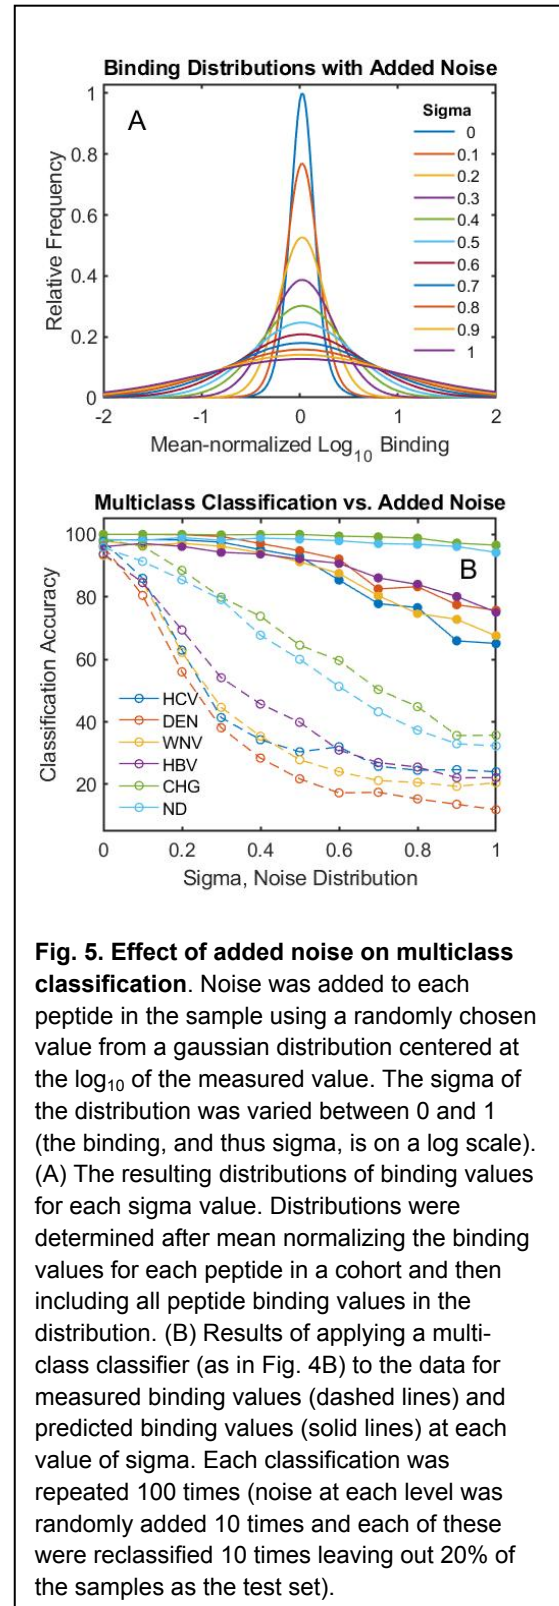

**Fig. 5. Effect of added noise on multiclass classification.** Noise was added to each peptide in the sample using a randomly chosen value from a gaussian distribution centered at the  $\text{log}_{10}$  of the measured value. The sigma of the distribution was varied between 0 and 1 (the binding, and thus sigma, is on a log scale). (A) The resulting distributions of binding values for each sigma value. Distributions were determined after mean normalizing the binding values for each peptide in a cohort and then including all peptide binding values in the distribution. (B) Results of applying a multiclass classifier (as in Fig. 4B) to the data for measured binding values (dashed lines) and predicted binding values (solid lines) at each value of sigma. Each classification was repeated 100 times (noise at each level was randomly added 10 times and each of these were reclassified 10 times leaving out 20% of the samples as the test set).

390  
391  
392  
393  
394  
395  
396  
397  
398  
399  
400  
401  
402  
403  
404  
405  
406  
407  
408  
409  
410  
411  
412  
413  
414  
415  
416  
417

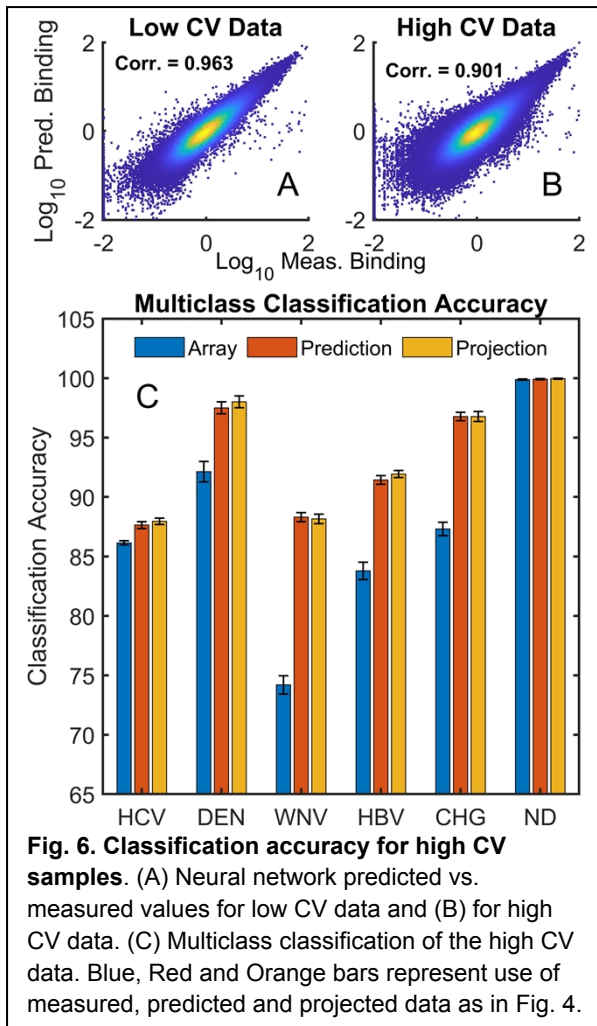

was applied to all 679 sample in Table 1 (all 542 low CV + 137 high CV) simultaneously. Note that the model does not include any information about what cohort each sample belongs to, so modeling does not introduce a cohort bias. The overall predicted vs. measured scatter plots and correlations are given in Fig. 6A and 6B for the low CV and high CV data, respectively. The number of points displayed was randomly selected to be constant between datasets and make the plots comparable. Prediction of the binding values for the high CV data results in more scatter relative to measured values, due to the issues with those particular arrays.

In Fig. 6B, the measured and predicted

values for the 542 low CV samples were used to train a multiclass classifier which was then used to predict the cohort class of the high CV samples. Three different data sources were used: 1) the measured array data (blue bars), 2) predicted binding values for the array peptide sequences based on the neural network model (red bars) and 3) projected values for *in silico* generated arrays similar to those used in Fig. 4 (orange bars). The classifier used was the same as that in Fig. 4 and the number of features selected was optimized for the data source as described for the analysis of Fig. 4 (20 features per cohort for the measured array data and 40 features per cohort for the two datasets based on the neural network predictions). In each case except for the non-disease samples, the use of predicted values resulted in a significantly better classification outcome.

## 418 **Discussion**

### 419 **A Quantitative Relationship Between Peptide Sequences and Serum IgG Binding**

420 The work described above shows that it is possible to use a relatively simple neural network  
421 model to generate a quantitative relationship between amino acid sequence and serum  
422 antibody binding over a large amino acid sequence space by training on a very sparse  
423 sampling of binding to that sequence space, similar to what was seen previously for isolated  
424 proteins binding to the array(21). Indeed, a reasonably accurate prediction can be obtained  
425 with only thousands of sequences (Fig. 2C).

426 The model system used here to explore the relationship between antibody molecular  
427 recognition profiles and amino acid sequences has limitations. Only 16 of the 20 natural amino  
428 acids were used in this model for technical reasons (see Materials and Methods). The  
429 sequences are also bound at one end to an array surface, and the other end has a free amine  
430 rather than a peptide bond as would be seen in a protein. In addition, the array peptides are  
431 short, linear and largely unstructured. This limits the range of molecular recognition  
432 interactions that can be observed, and thus the level of generality of the conclusions, but also  
433 suggests that comprehensive and accurate structure/binding relationships for humoral  
434 immune responses should be possible to generate given binding data in a broader sequence  
435 context. Such relationships would be invaluable for epitope prediction, autoimmune target  
436 characterization, vaccine development, effects of therapeutics on immune responses, etc.  
437 Even this rather simple model system for sequence space already shows the ability to capture  
438 differential binding information between multiple diseases simultaneously, including infectious  
439 diseases that involve closely related pathogens (Fig. 4).

440 The fact that one can develop comprehensive sequence/binding relationships within this  
441 model sequence space also explains, at least in part, why the immunosignature technology is  
442 promising. Immunosignaturing technology as applied to diagnostics uses the quantitative  
443 profile of IgG binding to a chemically diverse set of peptides in an array followed by a statistical  
444 analysis and classification of the resulting binding pattern to distinguish between diseases.

445 The approach has been successfully used to discriminate between serum samples from many  
446 different diseases (6-10, 12-14, 16, 17) and has been particularly effective with infectious  
447 disease(6-8, 18), as exemplified by the robust ability to classify the immune response to the  
448 infectious diseases studied here (Fig. 4D). This raises the question, why would antibodies that  
449 are generated by the immune system to bind tightly and specifically with pathogens show any  
450 specificity of interaction to nearly random peptide sequences on an array? The success of the  
451 neural network in comprehensive modeling of the sequence/binding interaction provides an  
452 answer. The *information* about disease-specific IgG binding is dispersed broadly across  
453 peptide sequence space, even in the interaction with sequences that themselves bind weakly  
454 and with low specificity, rather than being focused only on a few epitope sequences. It is not  
455 necessary to measure binding to the epitope if you have a selection of sequences that are  
456 broadly located in the vicinity of the epitope in sequence space.

457 Note also that by working with sequence/binding relationships, rather than purely statistical  
458 comparisons of binding values associated with specific sequences, one can combine  
459 information from arrays that contain different peptides. As shown in Fig. 2C, when 50% of the  
460 array is used to predict the other 50%, the correlation coefficient on average is well over 0.9.

461

### 462 **The Advantage of Analyzing Many Samples Simultaneously**

463 The results of Fig. 3 demonstrate that simultaneous neural network analysis of all samples  
464 from all cohorts provides a somewhat more accurate overall description of binding than does  
465 sample by sample analysis. Conceptually, this suggests that there is enough information in  
466 common between the antibody molecular recognition profiles of the various samples that using  
467 the same hidden layers to describe all of them, followed by an output layer with a distinct  
468 column describing each sample, is sufficient to both describe the general and specific binding  
469 interactions. An added practical benefit to this approach is a significant reduction in  
470 computation time, as described above.

## 471 **Using the Sequence/Binding Relationship to Eliminate Noise**

472 In Fig. 4, both the number of distinguishing peptides between cohorts and the classification  
473 accuracy improved when the measured values for each array sequence were replaced by the  
474 corresponding predicted values. Effectively, the neural network focuses information from the  
475 entire peptide dataset on each of the predicted values. This has an information aggregating  
476 effect that is extremely potent. In Fig. 5, random noise (sequence independent variation) is  
477 purposely added to the array. Since the noise is added to the  $\log_{10}$  of the binding value, a  
478 sigma of 0.5 corresponds to a several-fold increase in the noise distribution width, as can be  
479 seen in Fig. 5A, and a sigma of 1 broadens the distribution of linear values by roughly an order  
480 of magnitude. As a result, multi-class classification of the original data with noise added  
481 performs poorly (Fig. 5B, dashed lines). However, because the neural network predictions  
482 effectively aggregate the combined information from nearly 123,000 sequence/binding values  
483 in the generation of the sequence/binding relationship, random noise is dramatically reduced  
484 and a sigma of 0.5 has very little effect on classification and even a sigma of 1 provides  
485 reasonable results considering that this is a 6-cohort multi-class classification problem (Fig.  
486 5B, solid lines). This concept is taken further in Fig. 6, where arrays that for technical reasons  
487 were rejected because of excessive noise or physical artifacts affecting part of the array are  
488 included in the simultaneous analysis of all samples and their excess noise and defects are  
489 effectively repaired by comparison to other samples in the system. This is done without the  
490 network that creates the sequence-binding relationship having any information about which  
491 cohort is which in the analysis. The implication for array based diagnostic applications is that  
492 replacing a purely statistical approach like immunosignaturing with a structure-based  
493 approach provides a means of eliminating noise that is unrelated to the binding properties of  
494 the sequences (obviously, the real patient to patient variance is not removed as these  
495 differences are based on proper binding of antibodies to specific sequences).

## 496 **Using the Neural Network Model Itself for Disease Discrimination**



497  
498  
499  
500  
501  
502  
503  
504  
505  
506  
507  
508  
509  
510  
511  
512  
513  
514  
515  
516  
517  
518  
519  
520  
521  
522  
523  
524

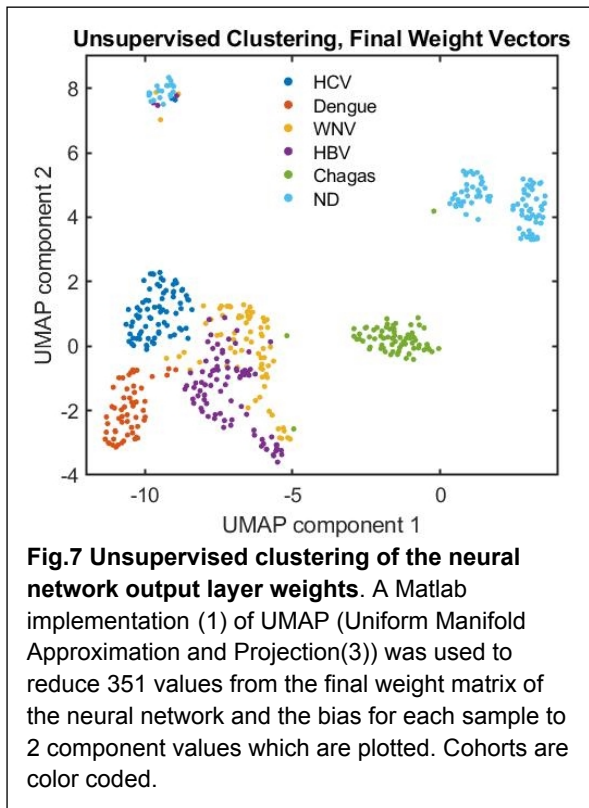

As shown in both Fig. 4 and 6, predicted binding values for a set of peptide sequences that approximately cover the same model sequence space as the array sequences can be used to discriminate between cohorts of samples just as well as predicted values of the original array sequences. In fact, it is the sequence/binding relationship that contains the discriminating information, and it is not necessary to use predicted binding to real sequences at all. In the neural network used here for simultaneous analysis of all samples,

the output layer consists of one column corresponding to each sample. The length of the column is the same as the width of the last hidden layer (350 values in this case). The 350 values associated with each sample in this output layer, combined with a single bias value added at the end, contains all of the distinguishing information for that sample and can effectively be used to replace the ~123,000 sequence/binding values measured with only a few hundred values. Fig. 7 shows an unsupervised clustering using the algorithm UMAP(1, 3) in which the 351 values of the final weight matrix for each sample plus the bias value were used to perform a dimension reduction to 2 components. The component values for each sample are plotted and the different cohorts are color coded. The plot makes biological sense; the sera from individuals infected by viruses are clustered together but well separated into subgroups while samples from Chagas disease and uninfected individuals are distantly separated from those collected from individuals suffering viral infections. As was seen in Fig. 4, sera from WNV and HBV infected individuals are the hardest to distinguish, but the rest are almost completely distinguishable in this unsupervised analysis. Interestingly, there is one small cluster consisting of different kinds of samples completely separated from the others (upper left, Fig. 7). UMAP is a nonlinear clustering algorithm which looks for the most similar



525 features in samples to determine clustering. Apparently, this cluster of individuals had some  
526 other unknown immunological stimulus in common that distinguished them from all others.  
527 The ability to detect such clusters could prove useful in public health bio-surveillance  
528 applications. Fig. 7 demonstrates that the cohort distinguishing information is contained in the  
529 351 values of the final weight matrix and bias; once the sequence-binding relationship is  
530 created, there is actually no need to use predicted binding values of sequences at all in order  
531 to distinguish the different cohorts effectively.

## 532 **Materials and Methods**

### 533 **Peptide arrays:**

534 The peptide arrays used were produced locally at ASU via photolithographically directed  
535 synthesis on silicon wafers using methods and instrumentation common in the electronics  
536 fabrication industry and as described previously(7). The synthesized wafers were cut into  
537 microscope slide sized pieces, each slide containing a total of 24 peptide arrays. Each array  
538 contained 122,926 unique peptide sequences that were 7-12 amino acids long (average of  
539 10). A 3 amino acid linker consisting of GSG was attached to each peptide and connected the  
540 C-terminus to the array surface via amino silane. The peptides were synthesized using 16 of  
541 the 20 natural amino acids (A,D,E,F,G,H,K,L,N,P,Q,R,S,V,W,Y) in order to simplify the  
542 synthesis process (C and M were excluded due to complications with deprotection and  
543 disulfide bond formation and I and T were excluded due to the similarity with V and S and to  
544 decrease the overall synthetic complexity and the number of photolithographic steps  
545 required(45). The arrays were created in 64 photolithographic steps (4 rounds through addition  
546 of the 16 amino acids) and sequences were chosen from the set to cover all possible  
547 sequences as evenly as the synthesis would allow. A detailed description of the amino acid  
548 composition of the arrays and peptide length distribution was published previously(21)  
549 (referred to as CIMw189-S9 in that publication).

### 550 **Serum samples:**

551 Deidentified serum samples were collected from three different sources: 1) Blood donors'  
552 samples from Creative Testing Solutions (CTS), Tempe, AZ, 2) LGC SeraCare, Milford, MA,  
553 and 3) Arizona State University (ASU) (Table 1). The dengue serotype 4 serum samples  
554 were collected from 2 of the above sources: 30 samples were provided by CTS and 35  
555 samples were purchased by Lawrence Livermore National Labs (LLNL) from SeraCare  
556 before they were donated to the Center for Innovations in Medicine (CIM) in the Biodesign  
557 Institute at ASU. Uninfected/control samples consisted of 200 CTS samples and 18 samples  
558 from healthy volunteers at ASU. All deidentified infectious case samples came from CTS. All  
559 samples provided by CTS were residual samples collected from blood donors who were  
560 asymptomatic at the time of blood donation and were identified as test-reactive for infectious  
561 disease markers during blood screening at CTS. At the time of donation, blood donors  
562 agreed to the use of their samples in research. Serum samples were frozen shortly after  
563 collection and not thawed before being received as aliquots. ASU samples were collected  
564 under IRB protocol STUDY00002876: DHS Immunosignaturing - A Platform for Detecting  
565 and Identifying Multiple Infectious Diseases – July 2015). Serum samples were frozen at the  
566 time of collection and not thawed before being received as aliquots. Further sample  
567 description and in-house validation of disease state is described in the supplementary  
568 materials.

569 **Sample processing and serum IgG binding measurements:**

570 Serum from the 6 sample cohorts (5 disease cohorts and uninfected) were diluted (1:1) in  
571 glycerol and stored at -20°C. Before incubation, each serum sample was prepared as 1:625  
572 dilution in 625 µL incubation buffer (phosphate buffered saline with 0.05 Tween 20, pH 7.2).  
573 The slides, each containing 24 separate peptide arrays were loaded into an ArrayIt microarray  
574 cassette (ArrayIt, San Mateo, CA). Then, 20 µL of the diluted serum (1:625) was added on a  
575 Whatman 903T Protein Saver Card. From the center (12 mm circle) of the protein card, a 6  
576 mm circle was punched, and put on the top of each well in the cassette, and covered with an  
577 adhesive plate seal (3M, catalogue number: 55003076). Incubation of the diluted serum  
578 samples on the arrays was performed for 90 minutes at 37°C with rotation at 6 RPM in an

579 Agilent Rotary incubator. Then, the arrays were washed 3 times in distilled water and dried  
580 under nitrogen. A goat anti-human IgG(H+L) secondary antibody conjugated with either  
581 AlexaFluor 555 (Life Technol.) or AlexaFluor 647 (Life Technol.) was prepared in 1x PBST pH  
582 7.2 to a final concentration of 4 nM. Following incubation with primary antibodies, secondary  
583 antibodies were added to the array, sealed with a 3M cover and incubated at 37°C for 1 hour.  
584 Then the slides were washed 3 times with PBST (137 mM NaCl, 2.7 mM KCl, 10 mM Na<sub>2</sub>HPO<sub>4</sub>,  
585 and 1.8 mM KH<sub>2</sub>PO<sub>4</sub>. 0.1% Tween (w/v)), followed by distilled water, removed from the  
586 cassette, sprayed with isopropanol and centrifuged, dried under nitrogen, and scanned at  
587 0.5um resolution in an Innopsys Innoscan 910 0.5 um laser scanner (Innopsys, Carbonne,  
588 Fr), excitation 547 nm, emission 590 nm. Each image was analyzed (GenePix Pro 6.0,  
589 Molecular Devices, San Jose, CA) and the raw fluorescence intensity data was exported as a  
590 GenePix Results ('gpr') file.

#### 591 **Binding analysis using neural networks:**

592 The neural network used to relate peptide sequences on the array to the measured binding of  
593 total serum IgG has been described previously(21). The amino acid sequences are input as  
594 one-hot representations. An encoder layer linearly transforms each amino acid into a real-  
595 valued vector. The amino acid encodings are then concatenated to form a full sequence  
596 encoding. Finally, a feed-forward neural network is used to predict total serum IgG binding  
597 from the sequence encoding. The encoder and neural network are trained on the peptide  
598 sequence/binding value pairs by optimizing an L2 loss function (sum of squared error)  
599 between the measured and predicted binding values. The model performance is assessed by  
600 calculating the Pearson correlation coefficient between the measured and predicted binding  
601 values for a test dataset not involved in the training. Except where otherwise stated, the neural  
602 networks used in this work are trained on all samples simultaneously, where all layers of the  
603 encoder and neural network weights are shared across cohorts except for the final layer of the  
604 neural network.

605 The neural network was trained using the  $\log_{10}$  of the median-normalized binding values from  
606 the peptide array (normalized by the binding values of all peptides in a given sample). Any  
607 zeros in the dataset were replaced by 0.01 x the median prior to taking the logarithm.

608

## 609 **Author Information**

### 610 Present Addresses

611 NWW, LK: Center for Molecular Design and Biomimetics, Biodesign Institute, Arizona State  
612 University, Tempe, AZ 85287

613 Z-GZ:: Caris Life Sciences, Tempe, AZ 85281

614 RC: Kriya Therapeutics, Redwood City, CA 94061

615 CD: Robust Diagnostics, Tempe, AZ 85287

616 PS: School of Life Sciences, Arizona State University, Tempe, AZ 85287

617 PW, VG: Creative Testing Solutions, 2424 W. Erie Dr., Tempe, AZ 85282

618

### 619 Author Contributions

620 All authors were involved in writing or editing the manuscript. In addition:

621 R.C performed data analysis and conceived of approaches, A.T.T developed algorithms and

622 concepts, L.K. developed concepts, P. S., C. D. and Z-G.Z were involved in the sample

623 curation and data collection, N. W. W performed data analysis and conceived approaches

624

### 625 Funding Sources

626 The data that was used in this analysis was collected under Chemical Biological

627 Technologies Directorate contracts HDTRA-11-1-0010, HDTRA1-12-C-0058 from the

628 Department of Defense (Defense Threat Reduction Agency, DTRA).

629

## 630 **Acknowledgements**

631 The principal investigator on the DTRA grant that supported the collection of data used in

632 this analysis was Professor Stephen Johnston; he provided valuable concepts and insights

633 that underlie the background work upon which this analysis rests.

634

## 635 **Abbreviations**

636 HCV: Hepatitis C Virus

637 HBV: Hepatitis B Virus

638 WNV: West Nile Virus

639 ND: Non Disease or No Known Infection

640 CV: Coefficient of Variation

641 UMAP: Uniform Manifold Approximation and Projection

642

## 643 References

- 644 1. Meehan C, Ebrahimian J, Moore W, Meeha S. Uniform Manifold Approximation and  
645 Projection (UMAP) MATLAB Central File Exchange. 2022.
- 646 2. Eilers PHC, Goeman JJ. Enhancing scatterplots with smoothed densities.  
647 *Bioinformatics*. 2004;20(5):623-8.
- 648 3. McInnes L, Healy J, Saul N, Großberger L. UMAP: Uniform Manifold Approximation  
649 and Projection. *Journal of Open Source Software*. 2018;3(29):861.
- 650 4. Brown JR, Stafford P, Johnston SA, Dinu V. Statistical methods for analyzing  
651 immunosignatures. *Bmc Bioinformatics*. 2011;12.
- 652 5. Kukreja M, Johnston SA, Stafford P. Comparative study of classification algorithms for  
653 immunosignaturing data. *Bmc Bioinformatics*. 2012;13.
- 654 6. Legutki JB, Magee DM, Stafford P, Johnston SA. A general method for characterization  
655 of humoral immunity induced by a vaccine or infection. *Vaccine*. 2010;28(28):4529-37.
- 656 7. Legutki JB, Zhao ZG, Greving M, Woodbury N, Johnston SA, Stafford P. Scalable  
657 High-Density Peptide Arrays for Comprehensive Health Monitoring. *Nat Commun*.  
658 2014;5:4785.
- 659 8. Navalkar KA, Johnston SA, Woodbury N, Galgiani JN, Magee DM, Chicacz Z, et al.  
660 Application of immunosignatures for diagnosis of valley Fever. *Clin Vaccine Immunol*.  
661 2014;21(8):1169-77.
- 662 9. Nayak BP, Putterman C, Gerwien R, Sykes K, Tarasow TM. IMMUNOSIGNATURE  
663 TECHNOLOGY IDENTIFIES SYSTEMIC LUPUS ERYTHEMATOSUS FROM A DROP OF  
664 SERUM. *Annals of the Rheumatic Diseases*. 2016;75:1056-.
- 665 10. Restrepo L, Stafford P, Johnston SA. Feasibility of an early Alzheimer's disease  
666 immunosignature diagnostic test. *J Neuroimmunol*. 2013;254(1-2):154-60.
- 667 11. Richer J, Johnston SA, Stafford P. Epitope identification from fixed-complexity random-  
668 sequence peptide microarrays. *Mol Cell Proteomics*. 2014.
- 669 12. Scheck AC, Stafford P, Hughes A, Cichacz Z, Coons SW, Johnston SA.  
670 Immunosignaturing for the Diagnosis and Characterization of Human Brain Tumors. *Neuro-  
671 Oncology*. 2012;14:100-.
- 672 13. Singh S, Stafford P, Schlauch KA, Tillett RR, Gollery M, Johnston SA, et al. Humoral  
673 Immunity Profiling of Subjects with Myalgic Encephalomyelitis Using a Random Peptide  
674 Microarray Differentiates Cases from Controls with High Specificity and Sensitivity. *Mol  
675 Neurobiol*. 2016.
- 676 14. Stafford P, Cichacz Z, Woodbury NW, Johnston SA. Immunosignature system for  
677 diagnosis of cancer. *Proc Natl Acad Sci U S A*. 2014;111(30):E3072-80.
- 678 15. Stafford P, Johnston SA, Kantarci OH, Zare-Shahabadi A, Warrington A, Rodriguez M.  
679 Antibody characterization using immunosignatures. *Plos One*. 2020;15(3):e0229080.
- 680 16. Sykes KF, Legutki JB, Stafford P. Immunosignaturing: a critical review. *Trends  
681 Biotechnol*. 2013;31(1):45-51.
- 682 17. Tarasow TM, Rowe MW, Haddad M, Sykes K. Immunosignature technology detects  
683 stage I lung cancer from a drop of serum. *Cancer Research*. 2015;75.
- 684 18. Rowe M, Melnick J, Gerwien R, Legutki JB, Pfeilsticker J, Tarasow TM, et al. An  
685 ImmunoSignature test distinguishes *Trypanosoma cruzi*, hepatitis B, hepatitis C and West Nile  
686 virus seropositivity among asymptomatic blood donors. *PLoS Negl Trop Dis*.  
687 2017;11(9):e0005882.
- 688 19. Maeda D, Batista MT, Pereira LR, de Jesus Cintra M, Amorim JH, Mathias-Santos C,  
689 et al. Adjuvant-Mediated Epitope Specificity and Enhanced Neutralizing Activity of Antibodies  
690 Targeting Dengue Virus Envelope Protein. *Front Immunol*. 2017;8:1175.
- 691 20. Hughes AK, Cichacz Z, Scheck A, Coons SW, Johnston SA, Stafford P.  
692 Immunosignaturing Can Detect Products from Molecular Markers in Brain Cancer. *Plos One*.  
693 2012;7(7).



- 694 21. Taguchi AT, Boyd J, Diehnelt CW, Legutki JB, Zhao ZG, Woodbury NW.  
695 Comprehensive Prediction of Molecular Recognition in a Combinatorial Chemical Space  
696 Using Machine Learning. *ACS Comb Sci.* 2020;22(10):500-8.
- 697 22. Hecker M, Fitzner B, Wendt M, Lorenz P, Flechtner K, Steinbeck F, et al. High-Density  
698 Peptide Microarray Analysis of IgG Autoantibody Reactivities in Serum and Cerebrospinal  
699 Fluid of Multiple Sclerosis Patients. *Mol Cell Proteomics.* 2016;15(4):1360-80.
- 700 23. Tokarz R, Mishra N, Tagliafierro T, Sameroff S, Caciula A, Chauhan L, et al. A multiplex  
701 serologic platform for diagnosis of tick-borne diseases. *Scientific Reports.* 2018;8(1):3158.
- 702 24. Xu GJ, Kula T, Xu Q, Li MZ, Vernon SD, Ndung'u T, et al. Viral immunology.  
703 Comprehensive serological profiling of human populations using a synthetic human virome.  
704 *Science.* 2015;348(6239):aaa0698.
- 705 25. Hecker M, Fitzner B, Wendt M, Lorenz P, Flechtner K, Steinbeck F, et al. High-density  
706 peptide microarray analysis of IgG autoantibody reactivities in serum and cerebrospinal fluid  
707 of multiple sclerosis patients. *Molecular & cellular proteomics.* 2016;15(4):1360-80.
- 708 26. Tokarz R, Mishra N, Tagliafierro T, Sameroff S, Caciula A, Chauhan L, et al. A multiplex  
709 serologic platform for diagnosis of tick-borne diseases. *Scientific reports.* 2018;8(1):1-10.
- 710 27. Xu GJ, Kula T, Xu Q, Li MZ, Vernon SD, Ndung'u T, et al. Comprehensive serological  
711 profiling of human populations using a synthetic human virome. *Science.* 2015;348(6239).
- 712 28. Ionov Y, Rogovskyy AS. Comparison of motif-based and whole-unique-sequence-  
713 based analyses of phage display library datasets generated by biopanning of anti-Borrelia  
714 burgdorferi immune sera. *Plos One.* 2020;15(1):e0226378.
- 715 29. Pashov A, Shivarov V, Hadzhieva M, Kostov V, Ferdinandov D, Heintz KM, et al.  
716 Diagnostic Profiling of the Human Public IgM Repertoire With Scalable Mimotope Libraries.  
717 *Front Immunol.* 2019;10:2796.
- 718 30. Haynes WA, Kamath K, Waitz R, Daugherty PS, Shon JC. Protein-Based Immunome  
719 Wide Association Studies (PIWAS) for the Discovery of Significant Disease-Associated  
720 Antigens. *Front Immunol.* 2021;12:625311.
- 721 31. Haynes WA, Kamath K, Bozekowski J, Baum-Jones E, Campbell M, Casanovas-  
722 Massana A, et al. High-resolution epitope mapping and characterization of SARS-CoV-2  
723 antibodies in large cohorts of subjects with COVID-19. *Communications Biology.*  
724 2021;4(1):1317.
- 725 32. Asif M, Orenstein Y. DeepSELEX: inferring DNA-binding preferences from HT-SELEX  
726 data using multi-class CNNs. *Bioinformatics.* 2020;36(Suppl\_2):i634-i42.
- 727 33. Hare J, Morrison D, Nielsen M. Sampling SARS-CoV-2 Proteomes for Predicted CD8  
728 T-Cell Epitopes as a Tool for Understanding Immunogenic Breadth and Rational Vaccine  
729 Design. *Frontiers in Bioinformatics.* 2021;1.
- 730 34. Hie B, Zhong ED, Berger B, Bryson B. Learning the language of viral evolution and  
731 escape. *Science.* 2021;371(6526):284-8.
- 732 35. Shrock E, Fujimura E, Kula T, Timms RT, Lee IH, Leng Y, et al. Viral epitope profiling  
733 of COVID-19 patients reveals cross-reactivity and correlates of severity. *Science.*  
734 2020;370(6520).
- 735 36. Wu Z, Kan SBJ, Lewis RD, Wittmann BJ, Arnold FH. Machine learning-assisted  
736 directed protein evolution with combinatorial libraries. *Proc Natl Acad Sci U S A.*  
737 2019;116(18):8852-8.
- 738 37. Yoshida M, Hinkley T, Tsuda S, Abul-Haija YM, McBurney RT, Kulikov V, et al. Using  
739 Evolutionary Algorithms and Machine Learning to Explore Sequence Space for the Discovery  
740 of Antimicrobial Peptides. *Chem.* 2018;4(3):533-43.
- 741 38. Asif M, Orenstein Y. DeepSELEX: inferring DNA-binding preferences from HT-SELEX  
742 data using multi-class CNNs. *Bioinformatics.* 2020;36(Supplement\_2):i634-i42.
- 743 39. Hare J, Morrison D, Nielsen M. Sampling SARS-CoV-2 proteomes for predicted CD8  
744 T-cell epitopes as a tool for understanding immunogenic breadth and rational vaccine design.  
745 *Frontiers in Bioinformatics.* 2021;1:1.
- 746 40. Shrock E, Fujimura E, Kula T, Timms RT, Lee I-H, Leng Y, et al. Viral epitope profiling  
747 of COVID-19 patients reveals cross-reactivity and correlates of severity. *Science.*  
748 2020;370(6520).

- 749 41. Wu Z, Kan SJ, Lewis RD, Wittmann BJ, Arnold FH. Machine learning-assisted directed  
750 protein evolution with combinatorial libraries. *Proceedings of the National Academy of*  
751 *Sciences*. 2019;116(18):8852-8.
- 752 42. Yoshida M, Hinkley T, Tsuda S, Abul-Haija YM, McBurney RT, Kulikov V, et al. Using  
753 evolutionary algorithms and machine learning to explore sequence space for the discovery of  
754 antimicrobial peptides. *Chem*. 2018;4(3):533-43.
- 755 43. Jespersen MC, Peters B, Nielsen M, Marcatili P. BepiPred-2.0: improving sequence-  
756 based B-cell epitope prediction using conformational epitopes. *Nucleic Acids Res*.  
757 2017;45(W1):W24-w9.
- 758 44. Greiff V, Redestig H, Lück J, Bruni N, Valai A, Hartmann S, et al. A minimal model of  
759 peptide binding predicts ensemble properties of serum antibodies. *BMC Genomics*.  
760 2012;13(1):79.
- 761 45. Stafford P. Pseudorandom vs. Random Polymers - How to Improve the Efficiency of  
762 Lithography-Based Synthesis. 2019;1.
- 763

## 764 **Supporting Information**

765 **Figure S1. The correlation coefficient between the predicted and measured values for**  
766 **each of the 465 samples used in the analysis of Figure 2.**
